# Supplementary material for: Novel mutations of the SRD5A2 and AR genes in Thai patients with 46, XY disorders of sex development
Source: publisher site journal article supplement (doi:10.1515/jpem-2016-0048), 2016-11-16
Supplement: Supplementary file 1 [file jpem-2016-0048_suppl.docx]

**Supplementary Material**

**Novel mutations of the *SRD5A2* and *AR* genes in Thai patients with 46, XY disorders of sex development**

Chupong Ittiwut2, Jaturong Pratuangdejkul[5](mailto:jaturong.pra@mahidol.edu)5), Vichit Supornsilchai[1](mailto:pedploy@hotmail.com)1), Sasipa Muensri[2](mailto:sasipa.ms@hotmail.com)2), Yodporn Hiranras[1](mailto:doctornanny@gmail.com)1), Taninee Sahakitrungruang[1](mailto:ptaninee@hotmail.com)1), Suttipong Watcharasindhu[1](mailto:wacharasindhu@gmail.com)1), Kanya Suphapeetiporn[3,4](mailto:fmedksp@yahoo.com)3,4) and Vorasuk Shotelersuk3,4

1Division of Endocrinology, 2Central Laboratory, 3Center of Excellence for Medical Genetics, Department of Pediatrics, Faculty of Medicine, Chulalongkorn University, Bangkok, Thailand

4Excellence Center for Medical Genetics, King Chulalongkorn Memorial Hospital, the Thai Red Cross Society, Bangkok, Thailand

5Department of Microbiology, Faculty of Pharmacy, Mahidol University, Bangkok, Thailand

**Supplementary Table 1:** Primers for PCR amplification of a) *SRD5A2* and b) *AR.*

1. Primers for *SRD5A2*

| No. | Primer Name | 5' to 3' | Length | Tm (°C) | Size |
| --- | --- | --- | --- | --- | --- |
| 1) | SRD5A2-ex1-F | GAGGTGGGAGGCAGGATG | 18 | 55 | 494 bp |
| 2) | SRD5A2-ex1-R | GCTCTACGCTGCGCTCCT | 18 |  |  |
| 3) | SRD5A2-ex2-F | GTTAAGGCGAAATGGCAGAG | 20 | 52 | 356 bp |
| 4) | SRD5A2-ex2-R | CATGGCGATGTAGATTGTGG | 20 |  |  |
| 5) | SRD5A2-ex3-F | GCCCCTCCTTTCATTTTAGC | 20 | 52 | 299 bp |
| 6) | SRD5A2-ex3-R | TATCATTCGTGCCCTCACTG | 20 |  |  |
| 7) | SRD5A2-ex4-F | CCAAGAGGATTCCACCAAAC | 20 | 52 | 387 bp |
| 8) | SRD5A2-ex4-R | CAATCTTCCTCTGCGGGTTA | 20 |  |  |
| 9) | SRD5A2-ex5-F | AGGCTGTGGGAAGGAGAAAT | 20 | 52 | 441 bp |
| 10) | SRD5A2-ex5-R | GAAGCTTCAGTTGGGGATCA | 20 |  |  |

1. Primers for *AR*

| No. | Primer Name | Sequence 5’ to 3’ | Length | Tm (°C) | Size |
| --- | --- | --- | --- | --- | --- |
| 1) | AR-ex1a-F | AGCCTGTTGAACTCTTCTGAGC | 22 | 55 | 998 bp |
| 2) | AR-ex1a-R | GCAGTATCTTCAGTGCTCTTGC | 22 | 55 |  |
| 3) | AR-ex1b-F | TGAGTCCAGGGGAACAGCTT | 20 | 54 | 955 bp |
| 4) | AR-ex1b-R | CCAGGGGCAATCTGAGTGTT | 20 | 54 |  |
| 5) | AR-ex2-F | GCAGGTTAATGCTGAAGACC | 20 | 52 | 358 bp |
| 6) | AR-ex2-R | GGCCTTGCCAATGACTCTAT | 20 | 52 |  |
| 7) | AR-ex3-F | GTTTGGTGCCATACTCTGTCCA | 22 | 55 | 312 bp |
| 8) | AR-ex3-R | AAAATGAGGGAGAAGGGGGAGA | 22 | 55 |  |
| 9) | AR-ex4-F | TGTGACCAGGGAGAATGGTGAT | 22 | 55 | 511 bp |
| 10) | AR-ex4-R | CTGCCTGAGTTAATGGGCAGAA | 22 | 55 |  |
| 11) | AR-ex5-F | AGAGCATCTCTGCCCAACAG | 20 | 54 | 299 bp |
| 12) | AR-ex5-R | CATCACCACCAACCAGGTCT | 20 | 54 |  |
| 13) | AR-ex6-F | GAGACATTCCCTCTGGGCTTA | 21 | 54 | 300 bp |
| 14) | AR-ex6-R | CAGGAGCTGGCTTTTCCCTAA | 21 | 54 |  |
| 15) | AR-ex7-F | GGGGTCAAGTCTGTGGTCA | 19 | 53 | 354 bp |
| 16) | AR-ex7-R | GAAGCACCTCCCAACAGGT | 19 | 53 |  |
| 17) | AR-ex8-F | GAAGGGGGAGGAAACAAAAG | 20 | 52 | 375 bp |
| 18) | AR-ex8-R | AGGAAATTCCCCAAGGCACT | 20 | 52 |  |

**Supplementary Table 2:** Characteristics of each mutation.

| #No | Gene | gDNA | Protein | Polyphen | SIFT | rsid | Wild-type amino acid | Charge | Changed amino acid | Charge | Domain |
| --- | --- | --- | --- | --- | --- | --- | --- | --- | --- | --- | --- |
| 1 | *SRD5A2* | c.16C>T | p.Q6X | stopgain | stopgain | rs9332960 | Gln (Q) | polar | stop | - | TB |
| 2 | *SRD5A2* | c.59T>C | p.L20P | POSSIBLY DAMAGING (0.826) | TOLERATED (0.20) | Sahakitrungruang et al.(9) | Leu (L) | nonpolar | Pro (P) | nonpolar | TB |
| 3 | *SRD5A2* | c.383A>G | p.Y128C | PROBABLY DAMAGING (0.999) | TOLERATED (0.17) | novel | Tyr (Y) | polar | Cys (C) | polar | ? |
| 4 | *SRD5A2* | c.547G>A | p.G183S | PROBABLY DAMAGING (1.000) | DAMAGING (0.02) | rs121434247 | Gly (G) | nonpolar | Ser (S) | polar | ? |
| 5 | *SRD5A2* | c.607G>A | p.G203S | PROBABLY DAMAGING (1.000) | DAMAGING (0.00) | rs9332961 | Gly (G) | nonpolar | Ser (S) | polar | ? |
| 6 | *SRD5A2* | c.680G>A | p.R227Q | POSSIBLY DAMAGING (0.956) | DAMAGING (0.03) | rs9332964 | Arg (R) | basic | Gln (Q) | polar | ? |
| 7 | *AR* | c.1706G>T | p.G569V | PROBABLY DAMAGING (1.000) | DAMAGING (0.00) | CM952077 | Gly (G) | nonpolar | Val (V) | nonpolar | DBD |
| 8 | *AR* | c.2176C>T | p.R726C | PROBABLY DAMAGING (1.000) | DAMAGING (0.00) | novel | Arg (R) | basic | Cys (C) | polar | LBD |
| 9 | *AR* | c.2191G>A | p.V731M | PROBABLY DAMAGING (1.000) | DAMAGING (0.00) | rs137852571 | Val (V) | nonpolar | Met (M) | nonpolar | LBD |
